# Supplementary material for: Real-world outcomes and management strategies for venetoclax-treated chronic lymphocytic leukemia patients in the United States
Source: PubMed Central journal article supplement — Haematologica. 2018 Jun 7;103(9):1511–7. doi: 10.3324/haematol.2018.193615 (PMC6119152; doi:10.3324/haematol.2018.193615), 2018-09
Supplement: 2018.193615.MATO_SUPPL.pdf [file 2018.193615.MATO_SUPPL.pdf]

# Real-world outcomes and management strategies for venetoclax-treated chronic lymphocytic leukemia patients in the United States

Anthony R. Mato,<sup>1</sup> Meghan Thompson,<sup>2</sup> John N. Allan,<sup>3</sup> Danielle M. Brander,<sup>4</sup> John M. Pagel,<sup>5</sup> Chaitra S. Ujjani,<sup>6</sup> Brian T. Hill,<sup>7</sup> Nicole Lamanna,<sup>8</sup> Frederick Lansigan,<sup>9</sup> Ryan Jacobs,<sup>10</sup> Mazyar Shadman,<sup>11</sup> Alan P. Skarbnik,<sup>12</sup> Jeffrey J. Pu,<sup>13</sup> Paul M. Barr,<sup>14</sup> Alison R. Sehgal,<sup>15</sup> Bruce D. Cheson,<sup>6</sup> Clive S. Zent,<sup>14</sup> Hande H. Tuncer,<sup>16</sup> Stephen J. Schuster,<sup>2</sup> Peter V. Pickens,<sup>17</sup> Nirav N. Shah,<sup>18</sup> Andre Goy,<sup>12</sup> Allison M. Winter,<sup>7</sup> Christine Garcia,<sup>15</sup> Kaitlin Kennard,<sup>2</sup> Krista Isaac,<sup>19</sup> Colleen Dorsey,<sup>2</sup> Lisa M. Gashonia,<sup>2</sup> Arun K. Singavi,<sup>18</sup> Lindsey E. Roeker,<sup>1</sup> Andrew Zelenetz,<sup>1</sup> Annalynn Williams,<sup>14</sup> Christina Howlett,<sup>12</sup> Hanna Weissbrot,<sup>8</sup> Naveed Ali,<sup>17</sup> Sirin Khajavian,<sup>11</sup> Andrea Sitlinger,<sup>4</sup> Eve Tranchito,<sup>7</sup> Joanna Rhodes,<sup>2</sup> Joshua Felsenfeld,<sup>3</sup> Neil Bailey,<sup>5</sup> Bhavisha Patel,<sup>20</sup> Timothy F. Burns,<sup>9</sup> Melissa Yacur,<sup>13</sup> Mansi Malhotra,<sup>16</sup> Jakub Svoboda,<sup>2</sup> Richard R. Furman<sup>3</sup> and Chadi Nabhan<sup>21</sup>

*ARM and MT contributed equally to this work.*

<sup>1</sup>CLL Program, Leukemia Service, Division of Hematologic Oncology, Department of Internal Medicine, Memorial Sloan Kettering Cancer Center, New York, NY; <sup>2</sup>Center for CLL, Division of Hematology and Oncology, University of Pennsylvania, Philadelphia, PA; <sup>3</sup>New York Presbyterian & Weill Cornell, NY; <sup>4</sup>Division of Hematologic Malignancies and Cellular Therapy, Duke University, Durham, NC; <sup>5</sup>Center for Blood Disorders and Stem Cell Transplantation, Swedish Cancer Institute, Seattle, WA; <sup>6</sup>Georgetown University Hospital Lombardi Comprehensive Cancer Center, Washington, DC; <sup>7</sup>Taussig Cancer Institute, Cleveland Clinic Foundation, OH; <sup>8</sup>Columbia University Medical Center, New York, NY; <sup>9</sup>Dartmouth-Hitchcock Medical Center, Lebanon, NH; <sup>10</sup>Department of Hematologic Oncology and Blood Disorders, Levine Cancer Institute, Carolinas Healthcare System, Charlotte, NC; <sup>11</sup>University of Washington/Fred Hutchinson Cancer Research Center, Seattle Cancer Care Alliance, WA; <sup>12</sup>John Theurer Cancer Center, Hackensack Meridian Health, NJ; <sup>13</sup>Penn State Health, Hershey, PA; <sup>14</sup>Wilmot Cancer Institute Division of Hematology/Oncology, University of Rochester Medical Center, NY; <sup>15</sup>University of Pittsburgh Medical Center, PA; <sup>16</sup>Tufts Medical Center, Boston, MA; <sup>17</sup>Abington Hem. Onc. Assoc., Inc., Willow Grove, PA; <sup>18</sup>Division of Hematology & Oncology, Medical College of Wisconsin, Brookfield, WI; <sup>19</sup>Internal Medicine, Lankenau Medical Center, Wynnewood, PA; <sup>20</sup>Washington Hospital Center, DC and <sup>21</sup>Cardinal Health, Dublin, OH, USA

©2018 Ferrata Storti Foundation. This is an open-access paper. doi:10.3324/haematol.2018.193615

Received: March 17, 2018.

Accepted: June 5, 2018.

Pre-published: June 7, 2018.

Correspondence: matoa@mskcc.org

**Supplemental Data.****Supplemental Table 1. Venetoclax dosing and select toxicities**

|                                      |                                                      |
|--------------------------------------|------------------------------------------------------|
| Maximum dose achieved during ramp-up | 85.1% achieved 400 mg (n=120/141)                    |
| Stable dose following ramp-up        | 75.2% achieved 400 mg (n=103/137)                    |
| Dose interruptions                   | 29.6% required $\geq 1$ dose interruption (n=40/135) |
| Dose reductions                      | 20.5% required $\geq 1$ dose reduction (n=24/117)    |
| Neutropenia (ANC<1000)               | 47.4% (n=65/137)                                     |
| Thrombocytopenia (platelets <50,000) | 36.0% (n=49/136)                                     |
| Diarrhea (>7 bowel movements/day)    | 7.3% (n=10/138)                                      |
| Neutropenic fever                    | 11.6% (n=16/138)                                     |
| TLS (laboratory and clinical)        | 12.2% (n=17/139)                                     |

**Supplemental Table 2. Hospitalization during dose escalation**

| Number of hospitalization | Low risk<br>N=58 |    | Intermediate risk<br>N=48 |    | High risk<br>N=25 |   |
|---------------------------|------------------|----|---------------------------|----|-------------------|---|
|                           | %                | n  | %                         | n  | %                 | n |
| <b>0</b>                  | 34.5%            | 20 | 14.6%                     | 7  | 0                 | 0 |
| <b>1</b>                  | 20.7%            | 12 | 29.2%                     | 14 | 12.0%             | 3 |
| <b>2</b>                  | 25.9%            | 15 | 41.7%                     | 20 | 32.0%             | 8 |
| <b>3</b>                  | 5.2%             | 3  | 6.3%                      | 3  | 20.0%             | 5 |
| <b>4</b>                  | 5.2%             | 3  | 4.2%                      | 2  | 4.0%              | 1 |
| <b>5</b>                  | 8.6%             | 5  | 4.2%                      | 2  | 32.0%             | 8 |

**Supplemental Table 3. Second and third treatments following venetoclax**

|                                                                                                                                                                                                                                                                                                                                                     |
|-----------------------------------------------------------------------------------------------------------------------------------------------------------------------------------------------------------------------------------------------------------------------------------------------------------------------------------------------------|
| <p><b>Second treatment after venetoclax and response:</b><br/>n=7 patients</p> <ul style="list-style-type: none"><li>• Allogeneic SCT: CR</li><li>• HyperCVAD: PD</li><li>• Venetoclax + ibrutinib + Obinutuzumab: PD</li><li>• Ibrutinib + venetoclax: PD</li><li>• CAR + ibrutinib: PD</li><li>• PI3K inhibitor: PD</li><li>• Other: SD</li></ul> |
| <p><b>Third treatment after venetoclax and response</b><br/>n=5 patients</p> <ul style="list-style-type: none"><li>• CAR-T (2): 1 SD, 1 CR</li><li>• Venetoclax + ibrutinib + rituximab: SD</li><li>• R-CHOP: PD</li><li>• Other: PD</li></ul>                                                                                                      |

**Supplemental Figure 1. Overall survival by TP53 status.** OS is similar for patients with intact *TP53* and patients with *TP53* interruption, either *TP53* mutation or del(17p).

OS by TP53 status

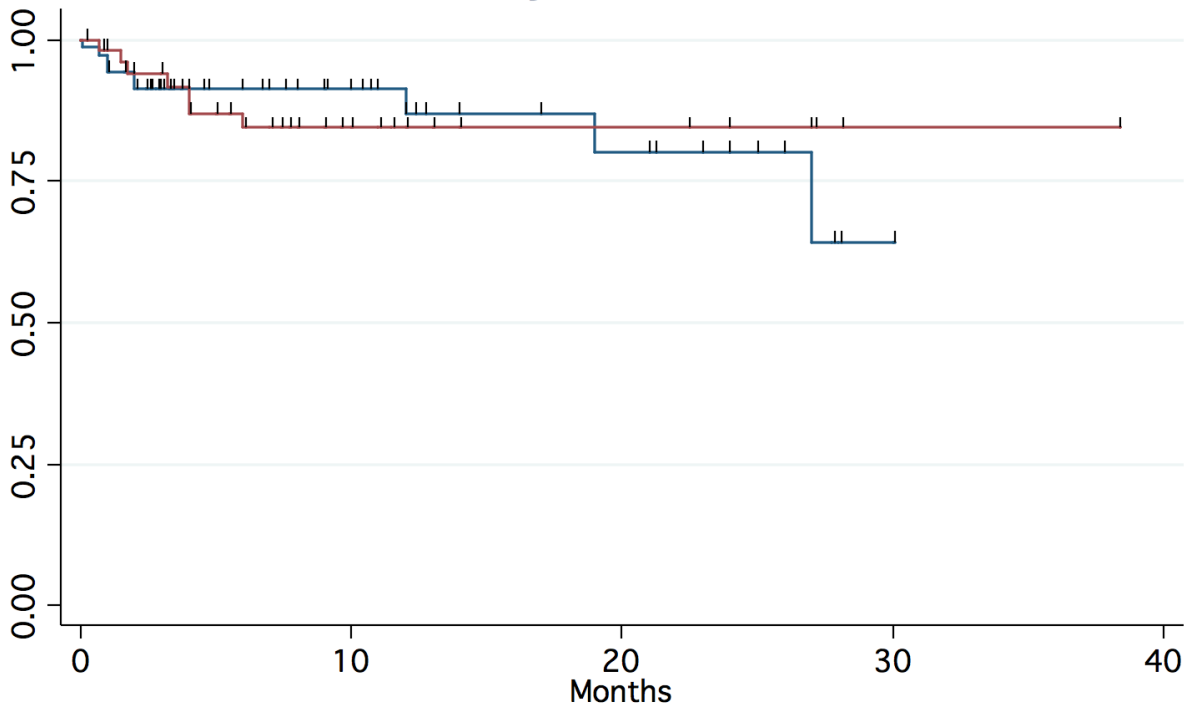

— TP53 intact — TP53 interrupted
